# Supplementary material
Source: PubMed Central journal article supplement (PMC3816472)
Supplement: 1311543110_pnas.201311543SI.pdf [file 1311543110_pnas.201311543SI.pdf]

# Supporting Information

Wang et al. 10.1073/pnas.1311543110

## SI Text

**Synthesis of Metallic Nanorods.** The procedure for growing bi-metallic nanorods (nanomotors) was adopted and modified from earlier reports (1). Anodic alumina membranes (AAO, purchased from Whatman Inc., 200 nm pore size) were used as the template for the electrodeposition of metals. We evaporated 5 nm of Cr and 350 nm of Ag by using a Kurt Lesker Lab-18 electron beam evaporator on the back side (branched pore side) of the AAO membrane to serve as the working electrode. A two-electrode system was generally used, with a Pt coil serving as both the pseudoreference electrode and the counterelectrode. When the cell was used in this configuration, electrodeposition was done at constant current. The metal plating solutions were purchased from Technic Inc. and were used as received. Metals of interest were sequentially electrodeposited into the AAO membrane, and the length of the metal segments was controlled by monitoring the charge passed. After the electrodeposition step, the membrane was thoroughly rinsed with deionized (DI) water and dried, and was soaked sequentially in 1:1 vol/vol HNO<sub>3</sub> and 0.5 M NaOH to dissolve the silver backing and the alumina membrane, respectively. After that the wires were sonicated and washed in DI water several times until the pH was neutral.

1. Wang W, Chiang T-Y, Velegol D, Mallouk TE (2013) Understanding the efficiency of autonomous nano- and microscale motors. *J Am Chem Soc* 135(28): 10557–10565.
2. Moran JL, Posner JD (2011) Electrokinetic locomotion due to reaction-induced charge auto-electrophoresis. *J Fluid Mech* 680:31–66.

Gold microparticles (AuMP, 0.8–1.5  $\mu\text{m}$ , 99.96%+) were purchased from Alfa Aesar. We purchased 1.7  $\mu\text{m}$  polystyrene spheres from Bangs Laboratories, Inc. (PS 04N), we purchased 1.5  $\mu\text{m}$  amine functionalized polystyrene spheres from Invitrogen (SKU A37324).

**Finite Element Simulations.** The finite element simulation model was based on two previous reports by Posner and coworkers (2, 3), and the details of the model can be found in our recently published paper (1). In this model, protons are generated and consumed at the Pt and Au ends of the nanorod (3  $\mu\text{m}$  long and 300 nm in diameter), respectively, at a constant flux ( $7 \times 10^{-6}$  mol/m<sup>2</sup>·s). As a result of the distribution of the positively charged protons, an electric field is generated that points from the Pt end to the Au end. Because the nanorod carries a negative surface potential (–50 mV), the electric field leads to a surface electroosmotic flow along the long axis of the nanorod from Pt to Au. The distribution of ions and electrical charges as well as the fluid flow were simulated simultaneously by COMSOL, and in the end the fluid flow profile around the nanorod was generated by the simulation. Then the method developed by Solomentsev and Anderson was used to obtain the motor speed based on the fluid velocity around the nanorod (4).

3. Moran JL, Wheat PM, Posner JD (2010) Locomotion of electrocatalytic nanomotors due to reaction induced charge autoelectrophoresis. *Phys Rev E Stat Nonlin Soft Matter Phys* 81(6 Pt 2):065302.
4. Solomentsev Y, Anderson JL (1994) Electrophoresis of slender particles. *J Fluid Mech* 279:197–215.

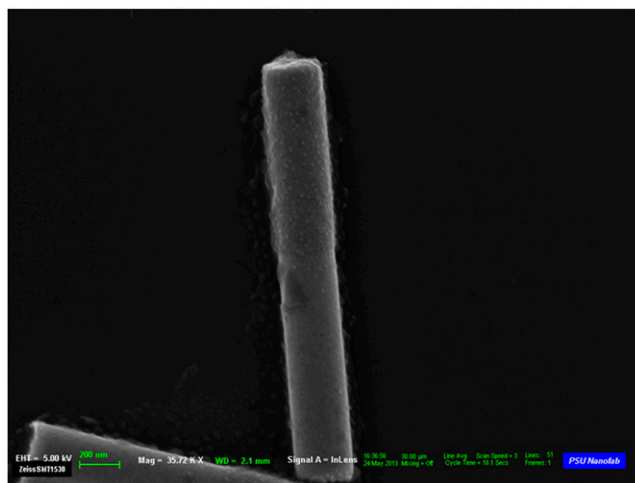

Fig. S1. Field emission SEM image of a typical Au–Pt nanorod fabricated by electrodeposition in an AAO membrane (top, Au; bottom, Pt).









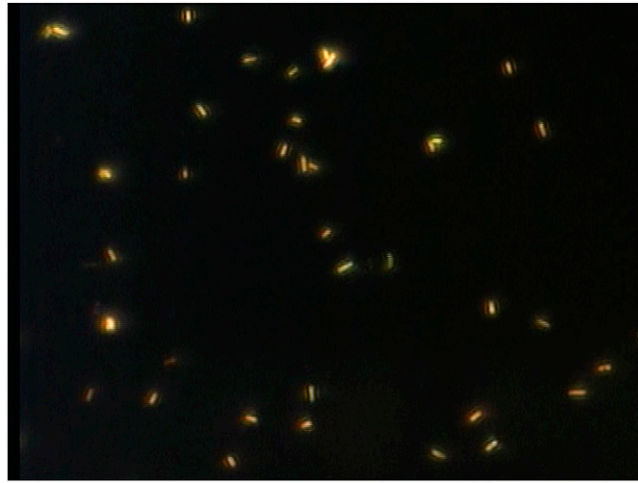

**Movie S2.** Interactions between active Au-Pt nanomotors and passive Au nanorods. Au-Pt nanomotors move with Pt end (silvery color) forward at  $\sim 20 \mu\text{m/s}$ , whereas Au nanorods move only slightly due to Brownian motion. This movie was taken at an overall magnification of 500 $\times$ .

[Movie S2](#)

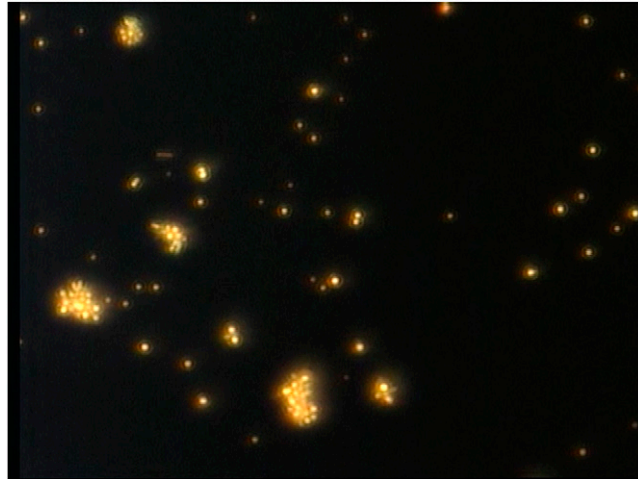

**Movie S3.** Interactions between active Au-Pt nanomotors and passive Au microspheres. Au-Pt nanomotors move with Pt end forward at  $\sim 20 \mu\text{m/s}$ , whereas microspheres move only slightly due to Brownian motion. Some aggregates of Au spheres and Au-Pt motors have already formed, as this movie was taken a short time after the samples were mixed. This movie was taken at an overall magnification of 500 $\times$ .

[Movie S3](#)



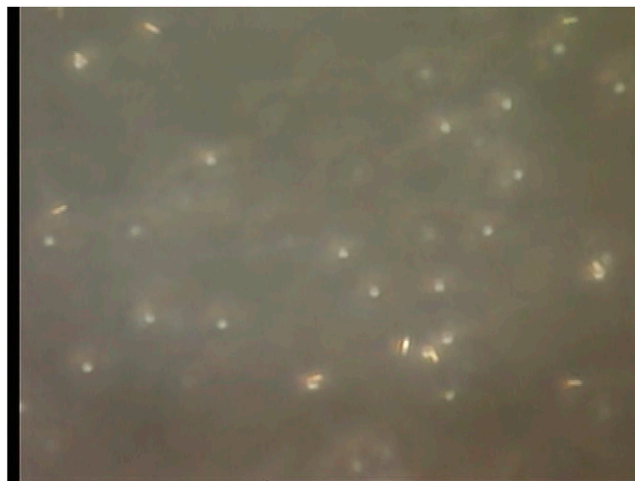

**Movie S4.** Interactions between one active Au-Pt nanomotor and four polystyrene spheres. The last PS sphere is picked up by the nanomotor at ~8s. This movie was taken at an overall magnification of 500 $\times$ .

[Movie S4](#)

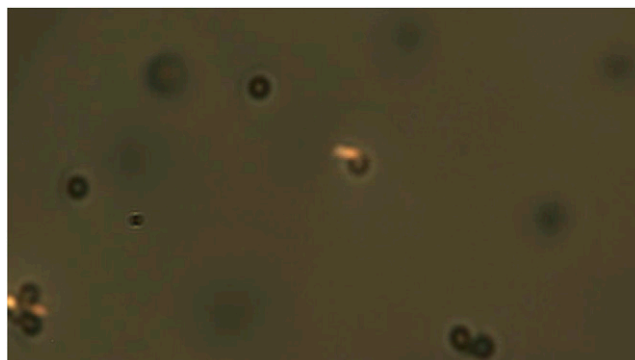

**Movie S5.** Rotation of an Au-Pt nanomotor with an amidine-functionalized PS sphere attached on the Au (golden color) segment. This movie was taken at an overall magnification of 1,000 $\times$ .

[Movie S5](#)

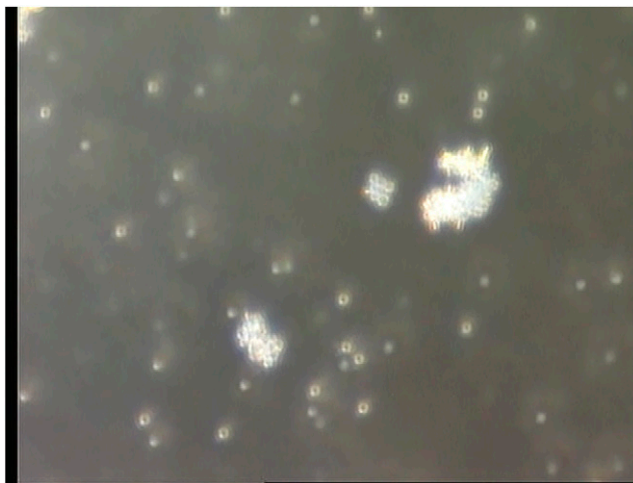

**Movie S6.** Example of an Au–Pt nanomotor pushing a large aggregate consisting of both Au–Pt nanorods and polystyrene spheres. This movie was taken at an overall magnification of 500 $\times$ .

[Movie S6](#)
